# Supplementary material for: CCL14 is a prognostic biomarker and correlates with immune infiltrates in hepatocellular carcinoma
Source: publisher site journal article supplement (doi:10.18632/aging.102656), 2020-01-12
Supplement: Supplementary file [file aging-v12i1-102656-supplementary-material-SD2.pdf]

**SUPPLEMENTARY TABLES**

**Supplementary Table 1. CCL14 expression in cancers versus normal tissue in oncomine database.**

| <b>Cancer</b> | <b>Cancer type</b>                                  | <b>P-value</b> | <b>Fold change</b> | <b>Rank (%)</b> | <b>Sample</b> | <b>Reference (PMID)</b> |
|---------------|-----------------------------------------------------|----------------|--------------------|-----------------|---------------|-------------------------|
| Bladder       | Superficial Bladder Cancer                          | 1.04E-14       | -2.67              | 2%              | 194           | 20421545                |
|               | Infiltrating Bladder Urothelial Carcinoma           | 3.08E-12       | -2.64              | 1%              | 130           | 20421545                |
| Brain and CNS | Classic Medulloblastoma                             | 6.81E-06       | 4.89               | 6%              | 50            | 11807556                |
| Breast        | Ductal Breast Carcinoma                             | 8.14E-05       | -7.126             | 3%              | 69            | 11553815                |
| Cervical      | Cervical Cancer                                     | 3.75E-08       | -2.651             | 2%              | 42            | 17510386                |
| Colorectal    | Colon Adenoma                                       | 4.90E-16       | -2.895             | 1%              | 57            | 18171984                |
|               | Colorectal Carcinoma                                | 6.48E-20       | -3.738             | 1%              | 82            | 20143136                |
|               | Colorectal Adenocarcinoma                           | 7.22E-14       | -3.246             | 1%              | 69            | 20957034                |
|               | Colorectal Carcinoma                                | 1.40E-11       | -2.63              | 3%              | 60            | 20957034                |
|               | Colon Adenocarcinoma                                | 1.55E-08       | -2.028             | 4%              | 91            | 17640062                |
|               | Rectosigmoid Adenocarcinoma                         | 3.69E-06       | -2.116             | 2%              | 15            | 17615082                |
|               | Rectal Mucinous Adenocarcinoma                      | 2.07E-06       | -2.723             | 4%              | 28            | TCGA                    |
| Esophageal    | Barrett's Esophagus                                 | 2.87E-06       | 2.912              | 3%              | 43            | 16449976                |
| Gastric       | Gastric Intestinal Type Adenocarcinoma              | 5.93E-05       | -2.091             | 5%              | 57            | 19081245                |
| Head and neck | Floor of the Mouth Carcinoma                        | 5.23E-07       | -2.323             | 1%              | 27            | 17510386                |
|               | Oral Cavity Squamous Cell Carcinoma                 | 7.52E-14       | -2.524             | 2%              | 79            | 21853135                |
|               | Salivary Gland Adenoid Cystic Carcinoma             | 8.20E-05       | -3.127             | 6%              | 22            | 12368205                |
|               | Head and Neck Squamous Cell Carcinoma               | 1.88E-10       | -3.424             | 4%              | 54            | 14729608                |
|               | Tongue Squamous Cell Carcinoma                      | 4.69E-05       | -2.818             | 7%              | 57            | 19138406                |
| Kidney        | Papillary Renal Cell Carcinoma                      | 6.11E-07       | -6.74              | 2%              | 24            | 19445733                |
| Liver         | Hepatocellular Carcinoma                            | 5.12E-74       | -3.643             | 1%              | 445           | 21159642                |
| Lung          | Small Cell Lung Carcinoma                           | 4.92E-06       | -8.044             | 2%              | 23            | 11707567                |
|               | Lung Carcinoid Tumor                                | 5.05E-08       | -10.696            | 5%              | 37            | 11707567                |
|               | Large Cell Lung Carcinoma                           | 2.06E-14       | -6.549             | 2%              | 84            | 20421987                |
|               | Squamous Cell Lung Carcinoma                        | 1.17E-13       | -4.594             | 6%              | 92            | 20421987                |
|               | Lung Adenocarcinoma                                 | 2.96E-12       | -3.424             | 4%              | 246           | 22080568                |
| Lymphoma      | Follicular Lymphoma                                 | 2.56E-22       | 5.311              | 2%              | 58            | 19412164                |
|               | Activated B-Cell-Like Diffuse Large B-Cell Lymphoma | 5.72E-09       | 3.017              | 5%              | 37            | 19412164                |
|               | Diffuse Large B-Cell Lymphoma                       | 2.99E-12       | 3.546              | 7%              | 64            | 19412164                |
| Melanoma      | Benign Melanocytic Skin Nevus                       | 4.69E-07       | -4.809             | 1%              | 25            | 16243793                |
|               | Cutaneous Melanoma                                  | 3.85E-13       | -15.472            | 1%              | 52            | 16243793                |
| Ovarian       | Ovarian Serous Adenocarcinoma                       | 1.36E-16       | -178.012           | 1%              | 42            | 19486012                |
|               | Ovarian Serous Cystadenocarcinoma                   | 6.00E-06       | -11.856            | 3%              | 594           | TCGA                    |
| Sarcoma       | Uterine Corpus Leiomyosarcoma                       | 5.43E-05       | -17.273            | 1%              | 13            | 15101043                |
|               | Myxofibrosarcoma                                    | 4.67E-15       | -6.67              | 1%              | 40            | 20601955                |
|               | Pleomorphic Liposarcoma                             | 1.10E-11       | -4.7               | 1%              | 32            | 20601955                |
|               | Leiomyosarcoma                                      | 4.63E-13       | -4.899             | 1%              | 35            | 20601955                |
|               | Dedifferentiated Liposarcoma                        | 4.65E-13       | -3.998             | 1%              | 55            | 20601955                |
|               | Myxoid/Round Cell Liposarcoma                       | 2.88E-09       | -2.977             | 2%              | 29            | 20601955                |
|               | Fibrosarcoma                                        | 1.76E-05       | -7.174             | 1%              | 22            | 15994966                |
| Others        | Malignant Fibrous Histiocytoma                      | 7.11E-05       | -6.442             | 2%              | 24            | 15994966                |
|               | Vulvar Intraepithelial Neoplasia                    | 9.38E-06       | -4.368             | 1%              | 19            | 17471573                |
|               | Malignant Fibrous Histiocytoma                      | 7.11E-05       | -6.442             | 2%              | 24            | 15994966                |
|               | Pleural Malignant Mesothelioma                      | 2.12E-05       | -2.442             | 3%              | 49            | 15920167                |
|               | Uterine Corpus Leiomyoma                            | 9.86E-05       | -2.305             | 4%              | 77            | 19622772                |
